# Supplementary material
Source: PubMed Central journal article supplement (PMC4046646)

Type of file: figure

Label: S1

Filename: Supp Figure - DEER & L-Curve.ppt.pdf

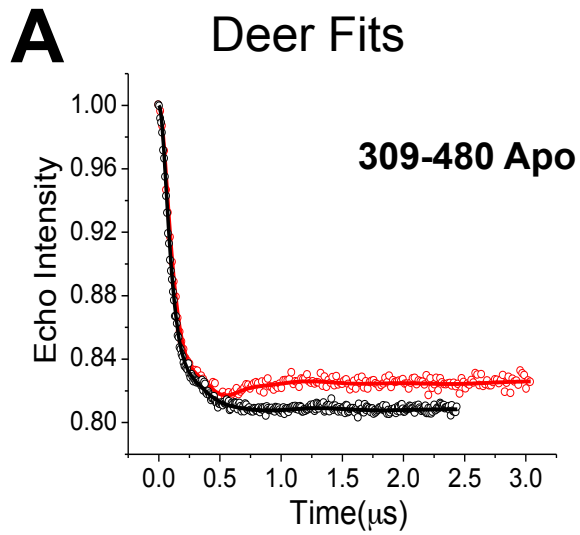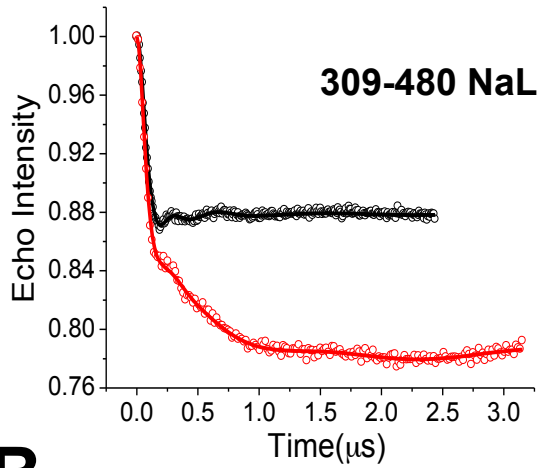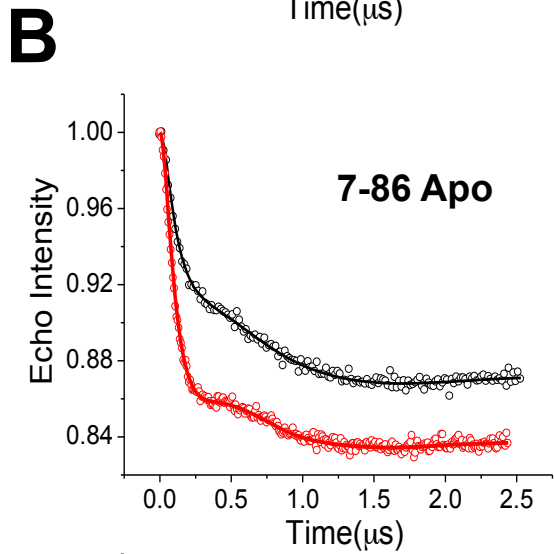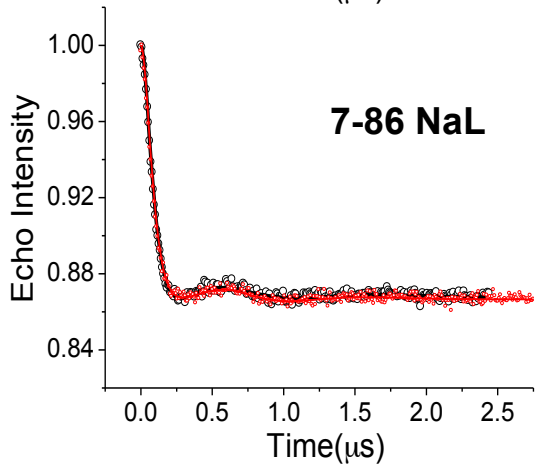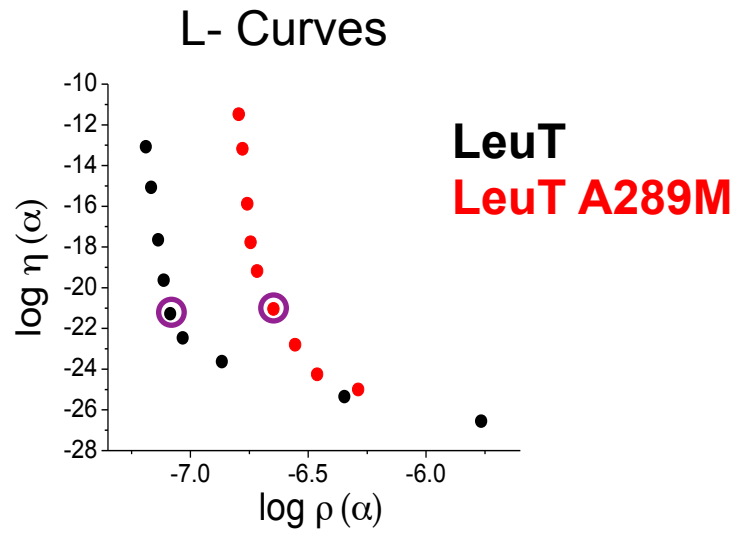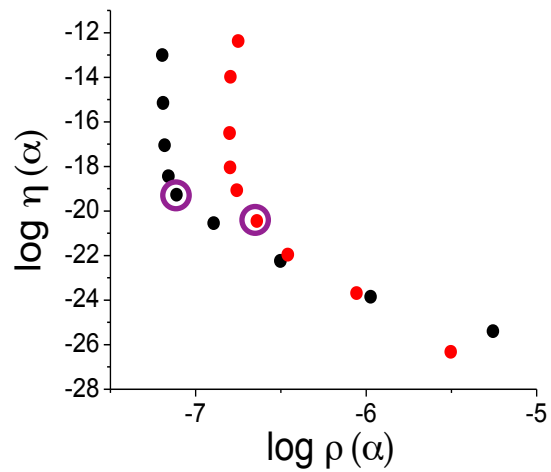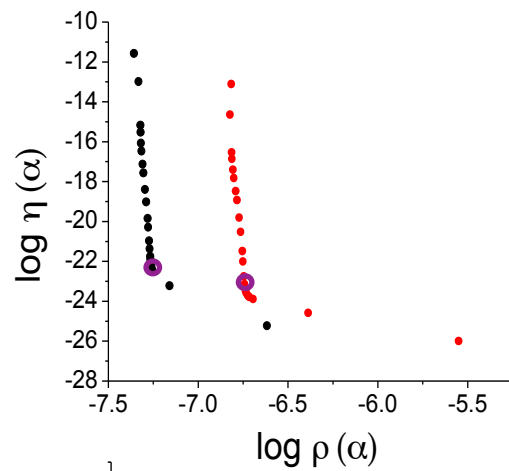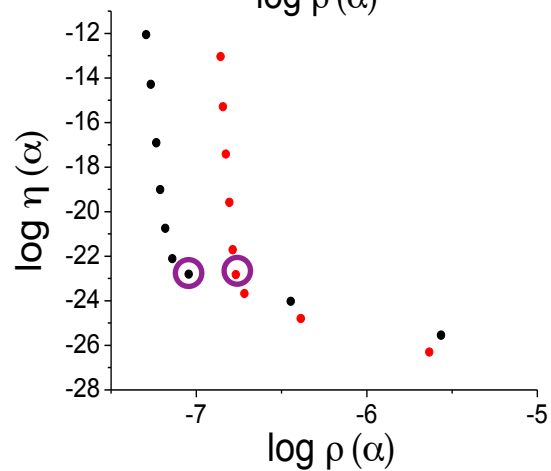

Supplement: NIHMS569876-supplement-02.pdf [file NIHMS569876-supplement-02.pdf]
